# Supplementary material for: Unravelling the role of individual components in pBAE/polynucleotide polyplexes in the synthesis of tailored carriers for specific applications: on the road to rational formulations
Source: Royal Society of Chemistry journal article supplement (doi:10.1039/d2na00800a), 2023-01-01
Supplement: d2na00800a1.pdf [file d2na00800a1.pdf]

## Unravelling the role of individual components in pBAE/polynucleotide polyplexes: on the road to rational formulations

María Navalón-López<sup>1</sup>, Aurora Dols-Perez<sup>2</sup>, Santiago Grijalvo<sup>3</sup>, Cristina Fornaguera<sup>1\*</sup>, Salvador Borrós<sup>1</sup>

<sup>1</sup>Grup d'Enginyeria de Materials (GEMAT) Institut Químic de Sarrià (IQS) Universitat Ramon Llull (URL), Via Augusta 390, 08017 Barcelona, Spain.

<sup>2</sup>Institut de Bioenginyeria de Catalunya (IBEC), The Barcelona Institute of Science and Technology (BIST), C/Baldiri i Reixac 11-15, 08028 Barcelona, Spain.

<sup>3</sup>Institute for Advanced Chemistry of Catalonia (IQAC-CSIC), and Networking Center on Bioengineering, Biomaterials and Nanomedicine (CIBER-BBN), C/ Jordi Girona 18-26, 08034 Barcelona, Spain.

*Corresponding author email: [cristina.fornaguera@iqs.url.edu](mailto:cristina.fornaguera@iqs.url.edu)*

---

KEYWORDS: polymeric nanoparticles; insight structure; polyplexes stability; polyplexes composition; poly (beta aminoester)

---

*No conflict of interest to be declared*

**Table S1.** Polyplexes sizes in mean and standard deviation, and PDI, from AFM measurements.

|     | <b>Equivalent Diameter<br/>from AFM*</b><br><b>(nm)</b> | <b>Stdev</b> | <b>Calculated PDI</b> |
|-----|---------------------------------------------------------|--------------|-----------------------|
| KH  | 140.3                                                   | 84.19        | 0.3599                |
| KHD | 91.38                                                   | 52.11        | 0.3251                |
| RH  | 115.6                                                   | 108.9        | 0.8874                |
| RHD | 153.2                                                   | 157.5        | 1.057                 |
| RK  | 116.4                                                   | 94.27        | 0.6560                |
| RKD | 197.8                                                   | 109.58       | 0.3068                |

Although not used for this purpose, AFM analysis enabled to measure polyplexes sizes by measuring the height of each polyplex after being deposited onto mica. To remark that it was assumed conservation of the volume before and after mica deposition. Equivalent sizes correspond to the mean value of, at least, 20 polyplexes for each nanoparticle type, as well as standard deviation. From them, an apparent polydispersity index (PDI) was calculated. In the majority of the polyplexes, size trend is equal comparing DLS and AFM measurements, as plotted in the next graph.

**Table S2.** Nanoparticles constructions stability at different temperatures. Nanoparticles constructs incubated at different timings and temperatures (25°C and 37°C) with PBS. Raw data without normalization.

|                                                                 |                                                                 | Time (h)                                                        |              |              |              |              |              |              |              |              |              |
|-----------------------------------------------------------------|-----------------------------------------------------------------|-----------------------------------------------------------------|--------------|--------------|--------------|--------------|--------------|--------------|--------------|--------------|--------------|
|                                                                 |                                                                 | 0                                                               | 2            | 4            | 6            | 8            | 10           | 12           | 24           | 48           |              |
| PBS                                                             | 25                                                              | K <sup>+</sup> /pGFP <sup>+</sup>                               | 27685 ± 449  | 26619 ± 915  | 26610 ± 1075 | 26775 ± 1303 | 26469 ± 2184 | 25399 ± 3960 | 23542 ± 4722 | 22143 ± 4566 | 21987 ± 3755 |
|                                                                 |                                                                 | KH <sup>+</sup> /pGFP <sup>+</sup>                              | 24885 ± 1600 | 21098 ± 1919 | 15067 ± 2821 | 10781 ± 2910 | 7993 ± 2445  | 5944 ± 1660  | 5383 ± 949   | 4976 ± 568   | 4454 ± 454   |
|                                                                 |                                                                 | K <sup>+</sup> H <sup>+</sup> /pGFP <sup>+</sup>                | 639 ± 43     | 564 ± 60     | 570 ± 85     | 620 ± 116    | 423 ± 45     | 523 ± 90     | 501 ± 28     | 525 ± 29     | 510 ± 44     |
|                                                                 |                                                                 | K <sup>+</sup> HD <sup>+</sup> /pGFP <sup>+</sup>               | 729 ± 30     | 753 ± 12     | 812 ± 71     | 740 ± 46     | 814 ± 60     | 708 ± 8      | 662 ± 54     | 511 ± 30     | 404 ± 1      |
|                                                                 |                                                                 | KH <sup>+</sup> D <sup>+</sup> /pGFP <sup>+</sup>               | 514 ± 50     | 480 ± 28     | 545 ± 45     | 549 ± 42     | 421 ± 57     | 395 ± 40     | 454 ± 50     | 420 ± 73     | 347 ± 56     |
|                                                                 |                                                                 | KHD <sup>+</sup> /pGFP <sup>+</sup>                             | 4709 ± 66    | 3939 ± 97    | 3551 ± 171   | 3185 ± 123   | 2954 ± 90    | 2723 ± 128   | 2484 ± 104   | 2252 ± 178   | 1745 ± 282   |
|                                                                 |                                                                 | R <sup>+</sup> H <sup>+</sup> /pGFP <sup>+</sup>                | 8891 ± 487   | 7914 ± 310   | 7457 ± 197   | 7270 ± 273   | 7079 ± 536   | 7073 ± 249   | 7005 ± 150   | 6977 ± 235   | 6823 ± 177   |
|                                                                 |                                                                 | RH <sup>+</sup> /pGFP <sup>+</sup>                              | 8430 ± 378   | 8244 ± 352   | 8131 ± 422   | 8139 ± 87    | 7915 ± 375   | 7982 ± 274   | 7545 ± 611   | 7212 ± 199   | 6988 ± 324   |
|                                                                 |                                                                 | R <sup>+</sup> H <sup>+</sup> D <sup>+</sup> /pGFP <sup>+</sup> | 839 ± 117    | 706 ± 29     | 702 ± 79     | 772 ± 111    | 712 ± 128    | 819 ± 74     | 720 ± 102    | 721 ± 56     | 713 ± 88     |
|                                                                 |                                                                 | R <sup>+</sup> HD <sup>+</sup> /pGFP <sup>+</sup>               | 4198 ± 132   | 3528 ± 219   | 3399 ± 239   | 3383 ± 200   | 3196 ± 232   | 3003 ± 77    | 2840 ± 298   | 2712 ± 206   | 2599 ± 232   |
|                                                                 | RH <sup>+</sup> D <sup>+</sup> /pGFP <sup>+</sup>               | 3073 ± 198                                                      | 2448 ± 109   | 2292 ± 154   | 2252 ± 72    | 2111 ± 215   | 2076 ± 159   | 2014 ± 43    | 1965 ± 180   | 1965 ± 77    |              |
|                                                                 | RHD <sup>+</sup> /pGFP <sup>+</sup>                             | 10626 ± 407                                                     | 6241 ± 349   | 6131 ± 75    | 6011 ± 160   | 5994 ± 310   | 5579 ± 299   | 5474 ± 305   | 4859 ± 424   | 3765 ± 253   |              |
|                                                                 | R <sup>+</sup> K <sup>+</sup> /pGFP <sup>+</sup>                | 16740 ± 686                                                     | 16056 ± 526  | 15022 ± 273  | 14420 ± 462  | 14020 ± 202  | 13713 ± 738  | 13032 ± 983  | 13009 ± 951  | 10860 ± 221  |              |
|                                                                 | RK <sup>+</sup> /pGFP <sup>+</sup>                              | 11160 ± 247                                                     | 10957 ± 401  | 10700 ± 499  | 10535 ± 691  | 10121 ± 76   | 9870 ± 461   | 8963 ± 576   | 9161 ± 609   | 8750 ± 511   |              |
|                                                                 | R <sup>+</sup> K <sup>+</sup> D <sup>+</sup> /pGFP <sup>+</sup> | 2965 ± 43                                                       | 3096 ± 83    | 3250 ± 55    | 3321 ± 47    | 3533 ± 103   | 3681 ± 38    | 3634 ± 176   | 2963 ± 76    | 2334 ± 63    |              |
|                                                                 | R <sup>+</sup> K <sup>+</sup> D <sup>+</sup> /pGFP <sup>+</sup> | 506 ± 139                                                       | 435 ± 139    | 389 ± 130    | 424 ± 130    | 391 ± 92     | 342 ± 86     | 351 ± 91     | 295 ± 31     | 279 ± 34     |              |
|                                                                 | RK <sup>+</sup> D <sup>+</sup> /pGFP <sup>+</sup>               | 578 ± 13                                                        | 493 ± 31     | 488 ± 34     | 434 ± 4      | 421 ± 19     | 425 ± 32     | 389 ± 37     | 284 ± 113    | 351 ± 104    |              |
|                                                                 | RKD <sup>+</sup> /pGFP <sup>+</sup>                             | 8685 ± 230                                                      | 8721 ± 253   | 8225 ± 314   | 7163 ± 513   | 5589 ± 517   | 3915 ± 426   | 2716 ± 291   | 987 ± 87     | 617 ± 129    |              |
|                                                                 | 37                                                              | K <sup>+</sup> /pGFP <sup>+</sup>                               | 21407 ± 337  | 5933 ± 368   | 4376 ± 400   | 3860 ± 106   | 3576 ± 50    | 3430 ± 260   | 3107 ± 78    | 3115 ± 198   | 3132 ± 599   |
|                                                                 |                                                                 | KH <sup>+</sup> /pGFP <sup>+</sup>                              | 15565 ± 337  | 3928 ± 529   | 3290 ± 188   | 3118 ± 85    | 3071 ± 138   | 2954 ± 183   | 2900 ± 208   | 2774 ± 181   | 2898 ± 133   |
| K <sup>+</sup> H <sup>+</sup> /pGFP <sup>+</sup>                |                                                                 | 428 ± 19                                                        | 167 ± 123    | 169 ± 33     | 105 ± 110    | 126 ± 88     | 145 ± 140    | 178 ± 36     | 188 ± 74     | 105 ± 50     |              |
| K <sup>+</sup> HD <sup>+</sup> /pGFP <sup>+</sup>               |                                                                 | 4198 ± 132                                                      | 3528 ± 219   | 3399 ± 239   | 3383 ± 200   | 3196 ± 232   | 3003 ± 77    | 2840 ± 298   | 2712 ± 206   | 1730 ± 50    |              |
| KHD <sup>+</sup> /pGFP <sup>+</sup>                             |                                                                 | 3073 ± 198                                                      | 2448 ± 109   | 2292 ± 154   | 2252 ± 72    | 2111 ± 215   | 2076 ± 159   | 2014 ± 43    | 1965 ± 180   | 1196 ± 18    |              |
| KH <sup>+</sup> D <sup>+</sup> /pGFP <sup>+</sup>               |                                                                 | 4709 ± 66                                                       | 3939 ± 97    | 3551 ± 171   | 3185 ± 123   | 2954 ± 90    | 2723 ± 128   | 2484 ± 104   | 2252 ± 178   | 1213 ± 512   |              |
| R <sup>+</sup> H <sup>+</sup> /pGFP <sup>+</sup>                |                                                                 | 6626 ± 446                                                      | 1592 ± 92    | 1248 ± 136   | 1303 ± 23    | 1304 ± 40    | 1300 ± 61    | 1255 ± 60    | 1140 ± 166   | 1040 ± 52    |              |
| RH <sup>+</sup> /pGFP <sup>+</sup>                              |                                                                 | 6627 ± 309                                                      | 2914 ± 342   | 1566 ± 347   | 1093 ± 188   | 1234 ± 117   | 961 ± 71     | 1032 ± 15    | 1059 ± 157   | 997 ± 91     |              |
| R <sup>+</sup> H <sup>+</sup> D <sup>+</sup> /pGFP <sup>+</sup> |                                                                 | 257 ± 93                                                        | 180 ± 94     | 58 ± 52      | 136 ± 28     | 165 ± 10     | 92 ± 65      | 112 ± 16     | 103 ± 84     | 357 ± 115    |              |
| R <sup>+</sup> HD <sup>+</sup> /pGFP <sup>+</sup>               |                                                                 | 5341 ± 625                                                      | 3607 ± 88    | 3321 ± 28    | 3091 ± 40    | 3058 ± 269   | 2744 ± 258   | 2489 ± 433   | 1361 ± 64    | 1321 ± 51    |              |
| RH <sup>+</sup> D <sup>+</sup> /pGFP <sup>+</sup>               | 2969 ± 813                                                      | 2017 ± 725                                                      | 1951 ± 802   | 1911 ± 754   | 1810 ± 790   | 1850 ± 843   | 1730 ± 838   | 1511 ± 993   | 1147 ± 213   |              |              |
| RHD <sup>+</sup> /pGFP <sup>+</sup>                             | 10579 ± 1905                                                    | 6788 ± 31                                                       | 6597 ± 334   | 6287 ± 167   | 5924 ± 16    | 5601 ± 514   | 5077 ± 910   | 2450 ± 434   | 2473 ± 1002  |              |              |
| R <sup>+</sup> K <sup>+</sup> /pGFP <sup>+</sup>                | 19356 ± 979                                                     | 13771 ± 134                                                     | 13378 ± 206  | 11225 ± 303  | 9854 ± 197   | 9725 ± 21    | 9661 ± 109   | 9467 ± 21    | 7700 ± 50    |              |              |
| R <sup>+</sup> K <sup>+</sup> D <sup>+</sup> /pGFP <sup>+</sup> | 9868 ± 42                                                       | 8464 ± 321                                                      | 8408 ± 317   | 7301 ± 83    | 7090 ± 206   | 7300 ± 3     | 7585 ± 19    | 7853 ± 31    | 7435 ± 116   |              |              |
| R <sup>+</sup> K <sup>+</sup> D <sup>+</sup> /pGFP <sup>+</sup> | 2876 ± 162                                                      | 2030 ± 136                                                      | 2028 ± 226   | 1683 ± 31    | 1547 ± 105   | 1557 ± 35    | 1495 ± 64    | 1459 ± 66    | 1153 ± 56    |              |              |
| R <sup>+</sup> KD <sup>+</sup> /pGFP <sup>+</sup>               | 822 ± 13                                                        | 585 ± 23                                                        | 541 ± 32     | 421 ± 16     | 394 ± 13     | 398 ± 19     | 373 ± 12     | 349 ± 15     | 366 ± 11     |              |              |
| RK <sup>+</sup> D <sup>+</sup> /pGFP <sup>+</sup>               | 805 ± 13                                                        | 593 ± 32                                                        | 542 ± 39     | 454 ± 22     | 436 ± 16     | 420 ± 20     | 395 ± 32     | 357 ± 23     | 357 ± 16     |              |              |
| RKD <sup>+</sup> /pGFP <sup>+</sup>                             | 5789 ± 140                                                      | 2525 ± 302                                                      | 1941 ± 181   | 4047 ± 220   | 1385 ± 61    | 1237 ± 23    | 1159 ± 26    | 1208 ± 55    | 2612 ± 254   |              |              |



**D**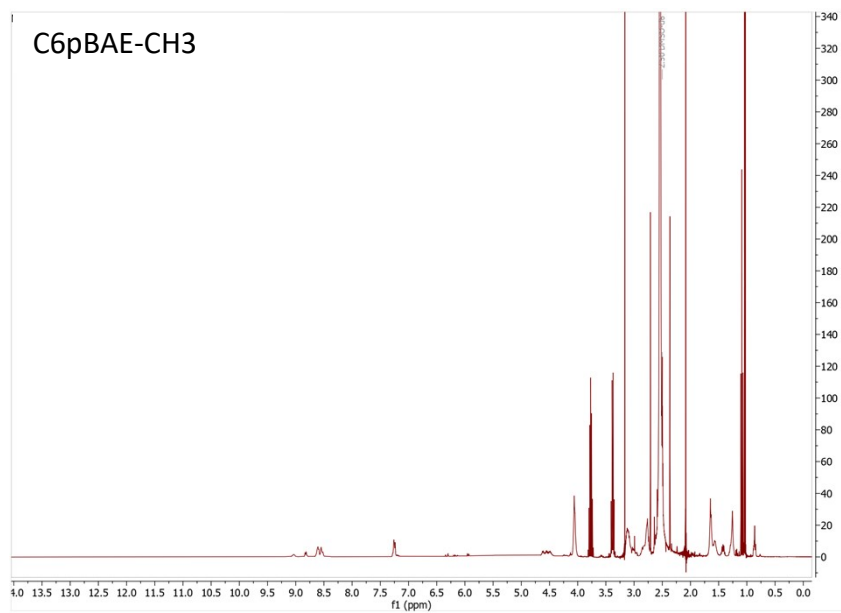**E**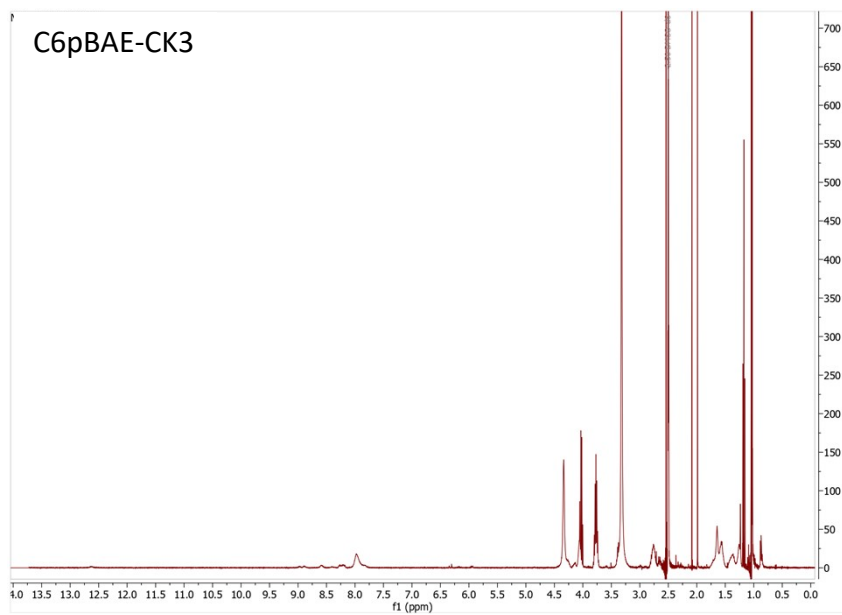

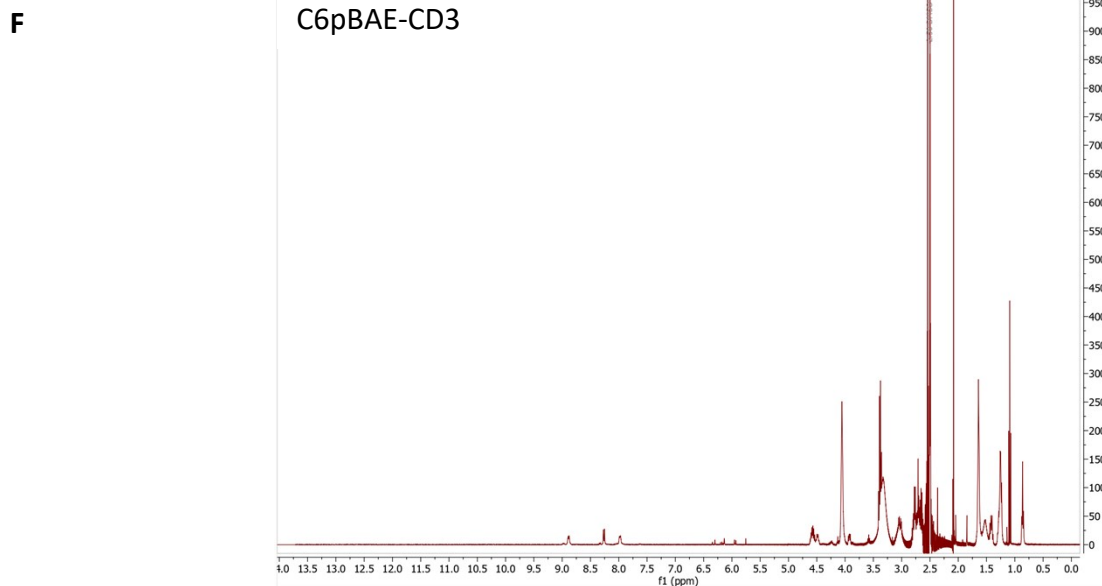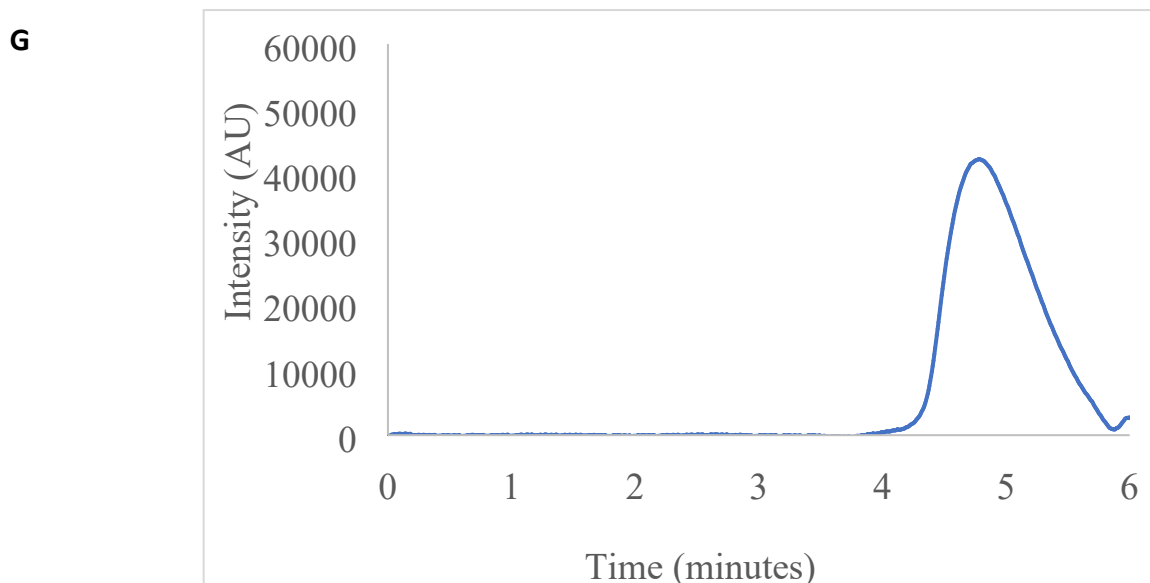

**Figure S1.** Polymers characterization: A - Chemical structure of the C6-pBAE backbone and the OM-pBAE with the different peptide combination; B – F:  $^1\text{H-NMR}$  characterization of the four polymers used: B – C6; C – C6CR3; D – C6CH3; E – C6CK3; F – C6CD3; and G- GPC analysis of the backbone polymer.

C6 polymers were characterized by NMR (structure). Additionally, first, prior to the addition of the oligopeptides. Since all the oligopeptide end-modified pBAE come from the same C6 template, we have conducted the GPC (HPSEC) characterisation of this chain before the oligopeptides attachment.

Molecular weight determination was conducted on a Hewlett-Packard 1050 Series HPLC system equipped with two GPC Ultrastaygel columns,  $10^3$  and  $10^4$  Å (5  $\mu\text{m}$  mixed, 300 mm x 19 mm, Waters Millipore Corporation, Milford, MA, USA) and THF as mobile phase. The molecular weight was calculated by comparison with the retention times of polystyrene standards.

Polymerization was confirmed by HPLC-SEC and the resulting C6 polymer had an average molecular weight ( $M_w$ ) of approximately 2,500 g/mol (relative to polystyrene standards) and a polydispersity ( $M_w/M_n$ ) of 1.81, showing a rather broad statistical distribution of polymer chain lengths.

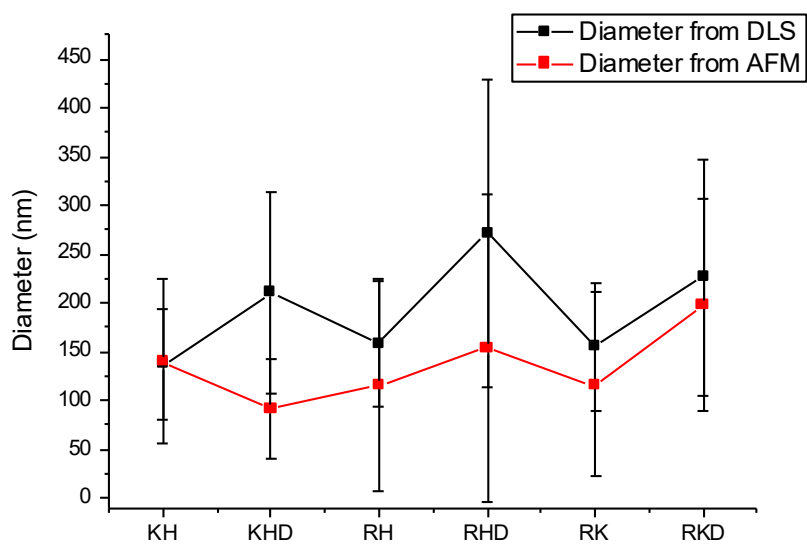

**Figure S2.** AFM diameter values of the nanoparticles compared to the obtained with the DLS. (AFM tip correction has been performed).

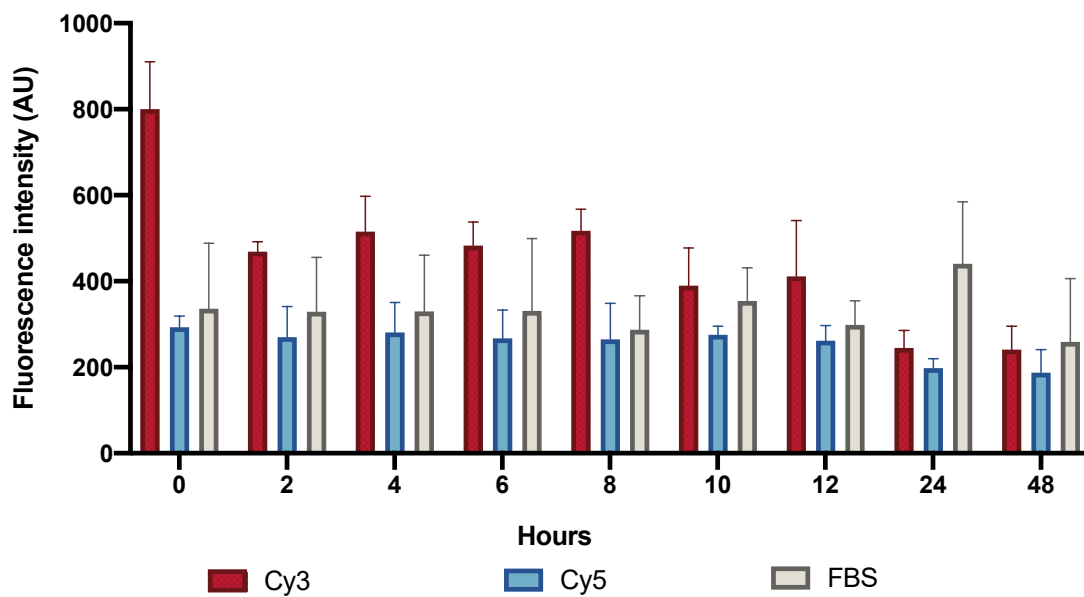

**Figure S3. FRET controls.** Fluorescent intensity of the control fluorophores obtained with FRET experiments. Raw data without normalization.



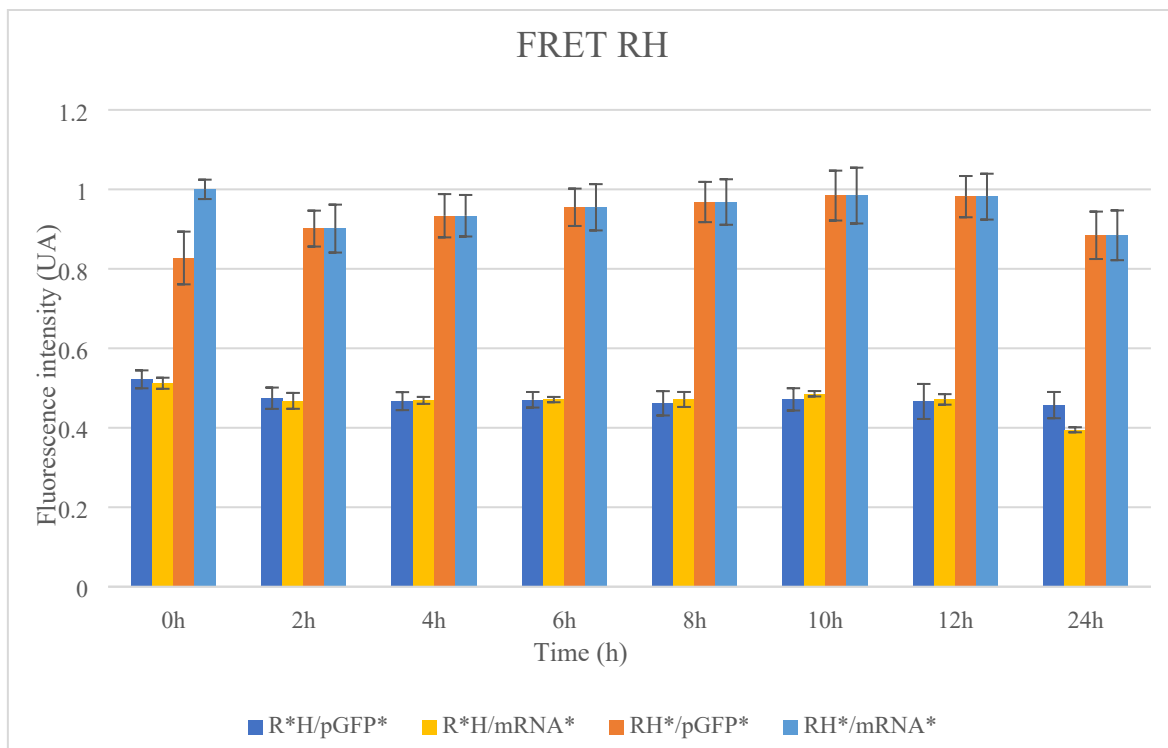

**Figure S4. FRET experiment RH nanoparticles with and different genetic materials (pGFP and mRNA).**

**Figure S5. Biocompatibility results.** A – Hemolysis of a representative cationic (KH) and anionically-coated (KHD) NP and B – Cell biocompatibility by MTT of all the combinations.

**A**

| Sample     | Hemolysis (%) |
|------------|---------------|
| Water (C+) | 100           |
| PBS (C-)   | 0             |
| KH         | 4,15          |
| KHD        | 1,62          |

**B**

|     | Cell Viability (%) | ± SD (%) |
|-----|--------------------|----------|
| C-  | 100                | 0,17     |
| RK  | 117                | 0,06     |
| RKD | 107                | 0,03     |
| KH  | 98                 | 0,06     |
| KHD | 107                | 0,08     |
| RH  | 114                | 0,06     |
| RHD | 95                 | 0,00     |

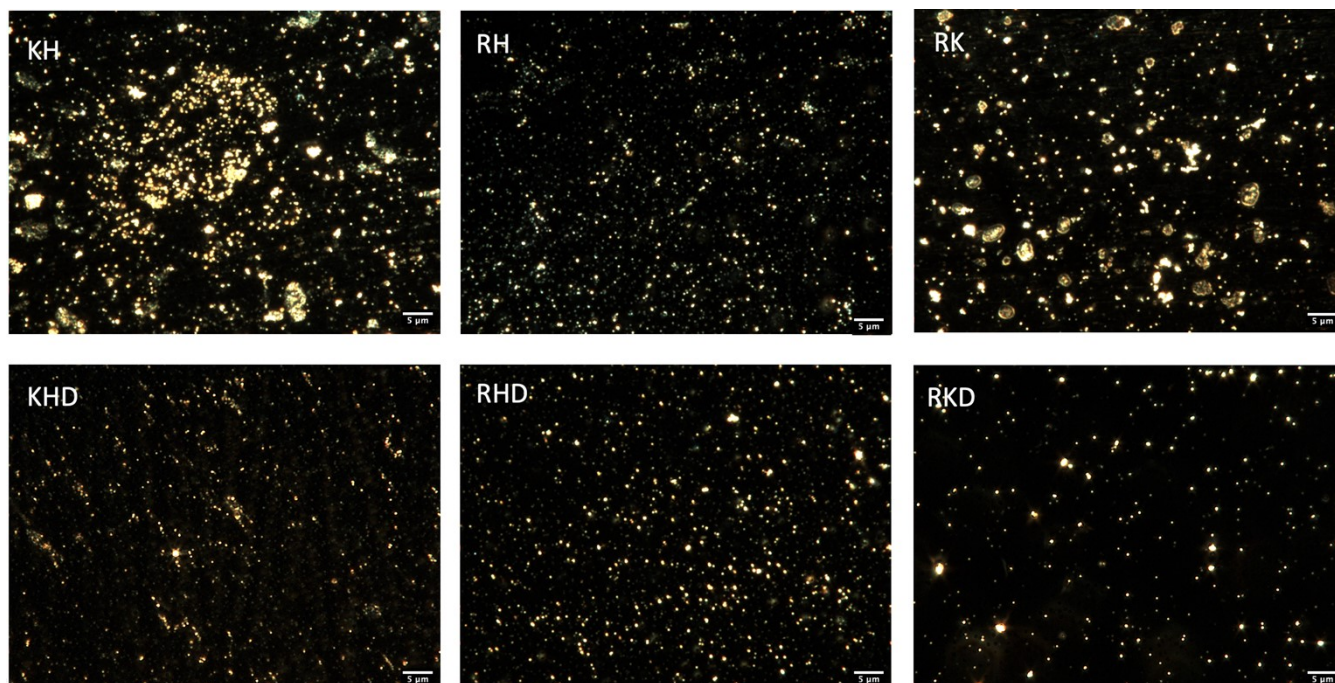

**Figure S6. Polyplexes optical images.** Optical images of the different nanoparticles' samples. Images were obtained with a 10X objective. Scale bars = 5 $\mu$ m.

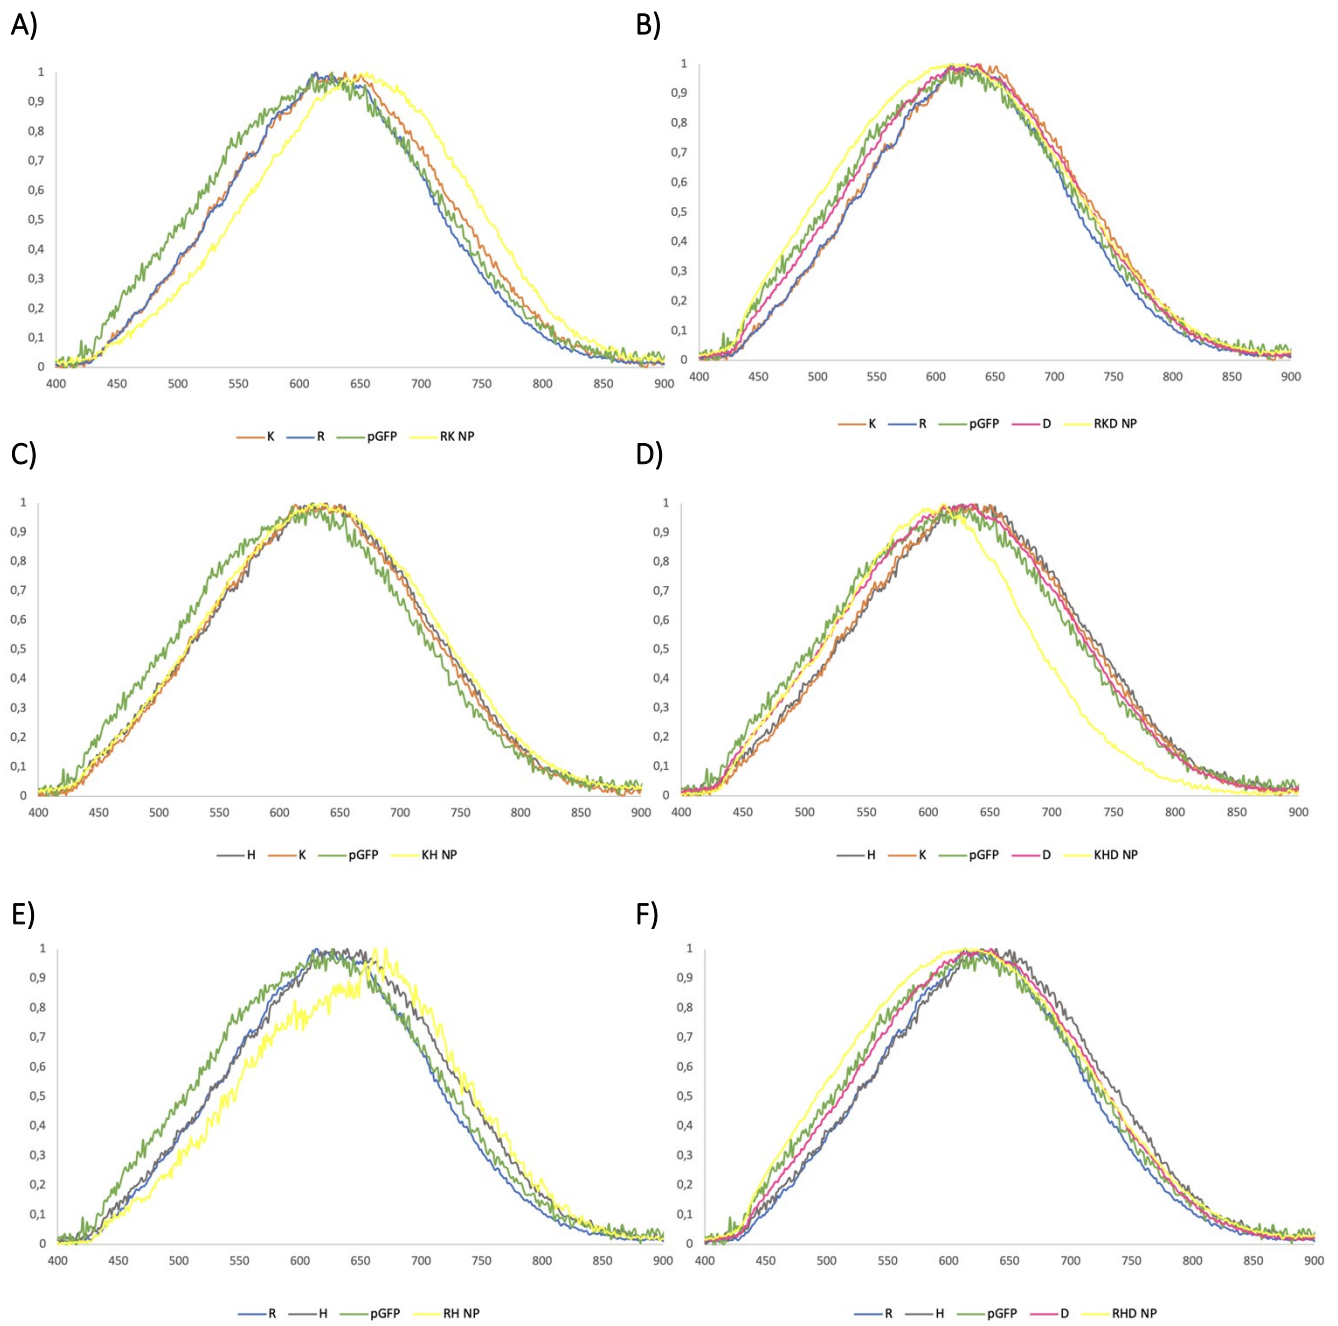

**Figure S7. Cytoviva's hyperspectral profile of the different samples.. A)-B) illustrates KH and KHD nanoparticles components respectively, C)-D) RH and RHD and E)-F) RK and RKD.**
